# Supplementary material for: The neighbourhood social environment and alcohol use among urban and rural Scottish adolescents
Source: Springer Nature journal article supplement (doi:10.1007/s00038-018-1181-8), 2018-12-03
Supplement: MOESM1 [file 16311688]

Journal: International Journal of Public Health

Title: The neighbourhood social environment and alcohol use among urban and rural Scottish adolescents

**Kernel density estimation (KDE)**

Kernel density estimation (KDE) for spatial point location data produces a smooth, continuous geographic surface for which every location in the study area is assigned a value which can then be used as an independent or dependent variable in statistical models (Carlos et al. 2010). The density of points is calculated using a pre-specified cell size, a kernel function, and a bandwidth (a circle with a radius centred on the focal location) such that the surface is highest above the case (outlet location) and zero at the specified bandwidth from the outlet. The centre of this cell size receives the density value (Chang, 2006). It is important to note that increasing the bandwidth produces a greater smoothing effect (the surface becomes more generalised by reducing the number and magnitude of local maxima) from the original data distribution. The selection of a bandwidth distance that is too large or too small, may over or under-smooth the data (Carlos et al. 2010, Chainey 2013). Therefore, sensitivity analysis is important. Alcohol outlet density has been previously examined using KDE (for example see Carlos et al. 2010).

References:

Carlos, H. A., et al. (2010) "Density estimation and adaptive bandwidths: a primer for public health practitioners." *Int J Health Geogr* 9: 39

Chainey, S. P. (2013) "Examining the influence of cell size and bandwidth size on kernel density estimation crime hotspot maps for predicting spatial patterns of crime." *Bull Geographical Soc Liege* 60: 7-19

Chang, K. (2006) *Geographic information systems*. John Wiley & Sons, Ltd.

Supplementary Table 1: Empty models examining drinking behaviours across neighbourhoods and schools, Scottish Health Behaviour in School-aged Children Survey, 2010 (95% credible intervals)

|                                           | Neighbourhood only   | School only          | Cross-classified    |
|-------------------------------------------|----------------------|----------------------|---------------------|
| <i>Have ever drank (n=1550)</i>           |                      |                      |                     |
| Neighbourhood level variance              | 0.353 (0.083,0.677)* |                      | 0.281 (0.011,0.631) |
| School level variance                     |                      | 0.303 (0.072,0.608)* | 0.147 (0.002,0.475) |
| Neighbourhood % of variance accounted for | 9.7                  |                      | 7.6                 |
| School % of variance accounted for        |                      | 8.4                  | 3.9                 |
| DIC                                       | 1411.31              | 1414.74              | 1409.31             |
| <i>Weekly drinking (n=1553)</i>           |                      |                      |                     |
| Neighbourhood level variance              | 0.199 (.007,0.445)   |                      | 0.177 (0.005,0.423) |
| School level variance                     |                      | 0.114 (0.001,0.318)  | 0.059(0.001,0.248)  |
| Neighbourhood % of variance accounted for | 5.7                  |                      | 5.0                 |
| School % of variance accounted for        |                      | 3.3                  | 1.7                 |
| DIC                                       | 1791.45              | 1797.58              | 1790.50             |
| <i>Lifetime drunkenness (n=1545)</i>      |                      |                      |                     |
| Neighbourhood level variance              | 0.123 (0.002,0.310)  |                      | 0.034 (0.001,0.173) |
| School level variance                     |                      | 0.155 (0.002,0.346)  | 0.146 (0.011,0.329) |
| Neighbourhood % of variance accounted for | 3.6                  |                      | 1.0                 |
| School % of variance accounted for        |                      | 4.7                  | 4.2                 |
| DIC                                       | 2119.55              | 2110.63              | 2110.48             |

DIC= Deviance Information Criterion; Burn-in 5,000; chain 200,000; \*p<0.05; Significance determined by z-score probability in multilevel models; DIC is used to examine for model fit improvement in cross-classified models by comparing to non-cross-classified models.

Electronic supplementary material (ESM)

Supplementary Table 2: Having ever drunk regressed on neighbourhood and individual measures (95% credible intervals) (n=1,457; Intermediate Data Zones n=190; Schools n=152), Scottish Health Behaviour in School-aged Children Survey, 2010

| Variable                             | Model 1             | Model 2            | Model 3            | Model 4            | Model 5            | Model 6            | Model 7            | Model 8            |
|--------------------------------------|---------------------|--------------------|--------------------|--------------------|--------------------|--------------------|--------------------|--------------------|
| Sex (male)                           | 1.00 (0.74,1.29)    | 1.01 (0.74,1.33)   | 1.01 (0.74,1.34)   | 1.00 (0.74,1.33)   | 1.01 (0.74,1.33)   | 1.01 (0.74,1.34)   | 1.02 (0.75,1.35)   | 1.02 (0.75,1.36)   |
| Age                                  | 1.98 (1.26,2.80)*** | 1.87 (1.13,3.12)** | 1.76 (1.07,2.87)** | 2.12 (1.19,2.96)** | 2.00(1.37,2.78)*** | 2.04 (1.30,2.92)** | 1.83(1.37,2.49)*** | 1.89 (1.25,2.78)** |
| Family Structure (Ref: both parents) |                     |                    |                    |                    |                    |                    |                    |                    |
| single parent                        | 1.45 (0.95,2.14)    | 1.42 (0.96,1.98)   | 1.38 (0.90,2.07)   | 1.37 (0.89,2.05)   | 1.40 (0.90,2.08)   | 1.37 (0.89,2.04)   | 1.31 (0.84,1.96)   | 1.30 (0.84,1.96)   |
| step-family/other                    | 2.20 (1.24,3.72)**  | 2.09 (1.18,3.55)*  | 2.01 (1.14,3.43)*  | 2.05 (1.15,3.51)*  | 2.04 (1.15,3.48)*  | 2.05 (1.16,3.49)*  | 2.00 (1.13,3.40) * | 2.00 (1.13,3.42)*  |
| Family Affluence (Ref: low)          |                     |                    |                    |                    |                    |                    |                    |                    |
| medium                               | 1.46 (0.98,2.08)    | 1.42 (0.96,2.04)   | 1.46 (0.99,2.11)   | 1.49 (1.00,2.15)   | 1.48 (0.99,2.14)   | 1.50 (1.00,2.15)*  | 1.50 (1.00,2.18)   | 1.52 (1.01,2.21)*  |
| high                                 | 1.39 (0.96,1.94)    | 1.41 (0.97,1.98)   | 1.48 (1.01,2.08)*  | 1.51 (1.03,2.15)*  | 1.49 (1.01,2.12)*  | 1.51 (1.02,2.15)*  | 1.51 (1.02,2.16)*  | 1.53 (1.03,2.19)*  |
| Ethnicity (white)                    | 3.39 (1.51, 6.48)** | 2.96 (1.30,5.79)** | 2.94 (1.31,5.71)*  | 3.00 (1.32,5.82)** | 3.09 (1.37,5.90)** | 3.06 (1.31,5.95)** | 2.74(1.17,5.43) *  | 2.78 (1.18,5.52)*  |
| On trade licence density             |                     | 0.97 (0.93,1.02)   | 0.98 (0.93,1.03)   | 0.97 (0.93,1.03)   | 0.97 (0.93,1.03)   | 0.97 (0.92,1.03)   | 0.97(0.93,1.03)    | 0.97 (0.92,1.03)   |
| Off trade license density            |                     | 1.06 (0.93,1.20)   | 1.04 (0.91,1.17)   | 1.02 (0.90,1.16)   | 1.04 (0.91,1.18)   | 1.02 (0.90,1.16)   | 1.01 (0.88,1.15)   | 1.02 (0.89,1.16)   |
| Urban/rurality (Ref: large cities)   |                     |                    |                    |                    |                    |                    |                    |                    |
| other urban                          |                     | 1.42 (0.83,2.30)   | 1.39 (0.80,2.29)   | 1.46 (0.84,2.40)   | 1.40 (0.81,2.30)   | 1.47 (0.85,2.40)   | 1.48 (0.84,2.44)   | 1.45 (0.81,2.42)   |
| accessible small towns               |                     | 1.83 (0.97,3.19)   | 1.79 (0.94,3.13)   | 1.99 (1.04,3.52)*  | 1.71 (0.89,3.05)   | 2.02 (1.03,3.58)*  | 2.02 (1.04,3.62)*  | 2.12 (1.04,3.91)*  |

Electronic supplementary material (ESM)

| Variable                                         | Model 1          | Model 2            | Model 3            | Model 4            | Model 5            | Model 6             | Model 7             | Model 8            |
|--------------------------------------------------|------------------|--------------------|--------------------|--------------------|--------------------|---------------------|---------------------|--------------------|
| accessible rural                                 |                  | 1.95 (1.06,3.29)*  | 2.02 (1.08,3.47)*  | 2.43 (1.27,4.19)** | 2.06 (1.09,3.57)*  | 2.46 (1.29,4.28) ** | 2.50 (1.31,4.40) ** | 2.53 (1.31,4.51)** |
| remote small towns                               |                  | 3.23 (1.61,5.97)** | 3.07 (1.50,5.71)** | 3.66(1.79,6.84)*** | 3.12 (1.53,5.82)** | 3.70(1.80,6.94)***  | 3.83(1.83,7.21)***  | 4.07(1.91,7.88)*** |
| remote rural                                     |                  | 2.59 (1.46,4.29)** | 2.60 (1.43,4.39)** | 3.59(1.88,6.33)*** | 2.71 (1.48,4.61)** | 3.64(1.91,6.37) *** | 3.61(1.87,6.43)***  | 3.60(1.83,6.50)*** |
| Neighbourhood deprivation (Ref: 1 most deprived) |                  |                    |                    |                    |                    |                     |                     |                    |
| 2                                                |                  |                    | 1.03 (0.61,1.63)   | 1.20 (0.70,1.92)   | 1.09 (0.65,1.75)   | 1.21 (0.70,1.95)    | 1.26 (0.73, 2.04)   | 1.30 (0.75,2.13)   |
| 3                                                |                  |                    | 0.78 (0.46,1.23)   | 0.94 (0.55,1.49)   | 0.85 (0.50,1.37)   | 0.94 (0.54,1.52)    | 1.01 (0.58, 1.63)   | 1.02 (0.59,1.66)   |
| 4 least deprived                                 |                  |                    | 0.81 (0.47,1.28)   | 0.99 (0.57,1.61)   | 0.88 (0.50,1.44)   | 1.01 (0.57,1.66)    | 1.05 (0.59,1.74)    | 1.09 (0.60,1.81)   |
| Neighbourhood social cohesion                    |                  |                    |                    | 0.34 (0.13,0.71)** |                    | 0.33 (0.12,0.75)*   | 0.33 (0.10,0.80)*   | 0.33 (0.10,0.77)*  |
| Neighbourhood disorder                           |                  |                    |                    |                    | 2.57 (0.53,7.92)   | 1.25 (0.22,4.10)    | 0.45 (0.06, 1.62)   | 0.45 (0.06,1.61)   |
| Perceived social cohesion                        |                  |                    |                    |                    |                    |                     | .99 (0.93,1.06)     | 0.99 (0.92,1.06)   |
| Perceived disorder                               |                  |                    |                    |                    |                    |                     | 1.24(1.10,1.40)***  | 1.23 (1.09,1.39)** |
| Neighbourhood variance                           | 0.36 (0.07,0.72) | 0.30 (0.03,0.66)   | 0.32 (0.01,0.69)   | 0.29 (0.02,0.65)   | 0.32 (0.03,0.69)   | 0.30 (0.03,0.66)    | 0.31 (0.04,0.68)    | 0.19 (0.00,0.60)   |
| School variance                                  |                  |                    |                    |                    |                    |                     |                     | 0.16 (0.00,0.52)   |
| DIC                                              | 1304.15          | 1302.91            | 1307.21            | 1301.69            | 1306.65            | 1302.86             | 1291.59             | 1292.85            |
| Residual Moran's I                               |                  |                    |                    |                    |                    |                     |                     | 0.016 (p=0.505)    |

Burn-in 5,000; chain 200,000; DIC=Deviance Information Criterion; Respondents missing on any predictor or outcome were not included in the models; \*= $p < 0.05$ , \*\*= $p < 0.01$ , \*\*\*= $p < 0.001$

Electronic supplementary material (ESM)

Supplementary Table 3: Weekly alcohol consumption regressed neighbourhood and individual measures, among lifetime drinkers (95% credible intervals) (n=1,205; Intermediate Data Zones n=190; Schools 148), Scottish Health Behaviour in School-aged Children Survey, 2010

| Predictor variable                   | Model 1               | Model 2            | Model 3            | Model 4            | Model 5            | Model 6            | Model 7            | Model 8            |
|--------------------------------------|-----------------------|--------------------|--------------------|--------------------|--------------------|--------------------|--------------------|--------------------|
| Sex (male)                           | 1.42<br>(1.10,1.83)** | 1.45 (1.11,1.86)** | 1.43 (1.10,1.83)** | 1.43 (1.10,1.83)** | 1.43 (1.10,1.84)** | 1.43 (1.10,1.84)** | 1.44 (1.10,1.86)** | 1.44 (1.09,1.86)** |
| Age                                  | 1.23<br>(0.78,1.64)   | 1.19 (0.67,1.98)   | 1.13 (0.71,1.76)   | 1.23 (0.92,1.63)   | 1.26 (0.86,1.70)   | 1.38 (0.80,2.39)   | 1.10 (0.75,1.66)   | 1.22 (0.82,1.54)   |
| Family Structure (Ref: both parents) |                       |                    |                    |                    |                    |                    |                    |                    |
| single parent                        | 1.62<br>(1.14,2.23)** | 1.52 (1.11,2.18)*  | 1.50 (1.05,2.07)*  | 1.51 (1.06,2.09)*  | 1.51 (1.06,2.09)*  | 1.52 (1.06,2.10)*  | 1.47 (1.02,2.04)*  | 1.47 (1.03,2.04)*  |
| step<br>family/other                 | 1.23<br>(0.81,1.78)   | 1.20 (0.79,1.74)   | 1.14 (0.75,1.66)   | 1.15 (0.76,1.68)   | 1.15 (0.76,1.67)   | 1.16 (0.76,1.68)   | 1.13 (0.74,1.65)   | 1.13 (0.74,1.66)   |
| Family Affluence (Ref: low)          |                       |                    |                    |                    |                    |                    |                    |                    |
| medium                               | 1.12<br>(0.80,1.53)   | 1.14 (0.81,1.57)   | 1.19 (0.84,1.63)   | 1.19 (0.84,1.64)   | 1.20 (0.85,1.65)   | 1.21 (0.85,1.67)   | 1.25 (0.87,1.73)   | 1.25 (0.88,1.73)   |
| high                                 | 1.10<br>(0.79,1.49)   | 1.14 (0.82,1.55)   | 1.22 (0.87,1.66)   | 1.22 (0.87,1.67)   | 1.22 (0.87,1.67)   | 1.23 (0.88,1.68)   | 1.26 (0.89,1.72)   | 1.26 (0.89,1.73)   |
| Ethnicity (white)                    | 0.72 (0.27,<br>1.59)  | 0.69 (0.27, 1.42)  | 0.66 (0.24,1.40)   | 0.68 (0.26,1.46)   | 0.72 (0.28, 1.61)  | 0.71 (0.28, 1.50)  | 0.66 (0.25, 1.42)  | 0.66 (0.25, 1.46)  |
| On trade licence<br>density          |                       | 1.00 (0.96,1.05)   | 1.01 (0.96,1.05)   | 1.01 (0.96,1.05)   | 1.00 (0.96,1.05)   | 1.00 (0.96,1.05)   | 1.00 (0.96,1.05)   | 1.01 (0.96,1.05)   |
| Off trade license<br>density         |                       | 1.04 (0.93,1.16)   | 1.00 (0.90,1.12)   | 1.00 (0.89,1.12)   | 1.01 (0.90,1.12)   | 1.01 (0.90,1.13)   | 0.99 (0.88,1.11)   | 0.99 (0.88,1.11)   |
| Urban/rurality (Ref: Large cities)   |                       |                    |                    |                    |                    |                    |                    |                    |

Electronic supplementary material (ESM)

| Predictor variable                               | Model 1          | Model 2             | Model 3             | Model 4             | Model 5           | Model 6           | Model 7           | Model 8           |
|--------------------------------------------------|------------------|---------------------|---------------------|---------------------|-------------------|-------------------|-------------------|-------------------|
| other urban                                      |                  | 1.24 (0.73,1.99)    | 1.21 (0.72,1.92)    | 1.22 (0.72,1.94)    | 1.23 (0.73,1.95)  | 1.23 (0.73,1.96)  | 1.25 (0.72,2.01)  | 1.24 (0.72,2.01)  |
| accessible small towns                           |                  | 2.19 (1.24,3.66) ** | 2.11 (1.22,3.47) ** | 2.16 (1.23,3.57) ** | 2.03 (1.16,3.35)* | 2.04 (1.13,3.42)* | 2.08 (1.14,3.54)* | 2.05 (1.12,3.49)* |
| accessible rural                                 |                  | 1.15 (0.65,1.92)    | 1.19 (0.68,1.97)    | 1.23 (0.69,2.06)    | 1.22 (0.69,2.02)  | 1.23 (0.68,2.06)  | 1.28 (0.70,2.19)  | 1.26 (0.69,2.15)  |
| remote small towns                               |                  | 1.34 (0.76,2.24)    | 1.23 (0.71,2.03)    | 1.27 (0.71,2.11)    | 1.26 (0.71,2.09)  | 1.26 (0.69,2.13)  | 1.32 (0.72, 2.25) | 1.30 (0.70, 2.24) |
| remote rural                                     |                  | 1.34 (0.80,2.15)    | 1.32 (0.79,2.10)    | 1.40 (0.79,2.30)    | 1.40 (0.82,2.26)  | 1.41 (0.78,2.35)  | 1.39 (0.77,2.34)  | 1.40 (0.78,2.36)  |
| Neighbourhood deprivation (Ref: 1 most deprived) |                  |                     |                     |                     |                   |                   |                   |                   |
| 2                                                |                  |                     | 0.87 (0.57,1.26)    | 0.89 (0.59,1.29)    | 0.90 (0.60,1.32)  | 0.89 (0.59,1.31)  | 0.91 (0.60,1.35)  | 0.92 (0.60,1.35)  |
| 3                                                |                  |                     | 0.72 (0.47,1.06)    | 0.74 (0.48,1.09)    | 0.77 (0.50,1.14)  | 0.76 (0.49,1.14)  | 0.80 (0.51,1.21)  | 0.81 (0.51,1.22)  |
| 4 least deprived                                 |                  |                     | 0.59 (0.37,0.89)*   | 0.60 (0.38,0.91)*   | 0.64 (0.40,0.97)* | 0.63 (0.39,0.97)* | 0.64 (0.40,1.00)* | 0.64 (0.39,1.00)* |
| Neighbourhood social cohesion                    |                  |                     |                     | 0.90 (0.44,1.67)    |                   | 1.07 (0.48,2.10)  | 1.38 (0.56,2.88)  | 1.35 (0.55,2.84)  |
| Neighbourhood disorder                           |                  |                     |                     |                     | 2.27 (0.65,5.90)  | 2.31 (0.58, 6.44) | 1.23 (0.25, 3.74) | 1.20 (0.25, 3.61) |
| Perceived social cohesion                        |                  |                     |                     |                     |                   |                   | .95 (0.89,1.01)   | .95 (0.90,1.01)   |
| Perceived disorder                               |                  |                     |                     |                     |                   |                   | 1.14 (1.03,1.27)* | 1.15 (1.03,1.27)* |
| Neighbourhood variance                           | 0.18 (0.01,0.44) | 0.17 (0.00,0.44)    | 0.11 (0.00,0.37)    | 0.12 (0.00,0.38)    | 0.12 (0.00,0.38)  | 0.12 (0.00,0.40)  | 0.17 (0.00,0.46)  | 0.14 (0.00,0.42)  |
| School variance                                  |                  |                     |                     |                     |                   |                   |                   | 0.05 (0.00,0.22)  |

Electronic supplementary material (ESM)

| Predictor variable | Model 1 | Model 2 | Model 3 | Model 4 | Model 5 | Model 6 | Model 7 | Model 8          |
|--------------------|---------|---------|---------|---------|---------|---------|---------|------------------|
| DIC                | 1503.53 | 1509.55 | 1509.10 | 1508.99 | 1508.47 | 1513.15 | 1499.86 | 1500.13          |
| Residual Moran's I |         |         |         |         |         |         |         | -0.031 (p=0.406) |

Burn-in 5,000; chain 200,000; DIC=Deviance Information Criterion; Respondents missing on any predictor or outcome were not included in the models; \*= $p < 0.05$ , \*\*= $p < 0.01$ , \*\*\*= $p < 0.001$

Electronic supplementary material (ESM)

Supplementary Table 4: Drunkenness regressed on neighbourhood and individual measures, among current drinkers (95% credible intervals) (n=1,198; Intermediate Data Zones n=190; Schools 148), Scottish Health Behaviour in School-aged Children Survey, 2010

| Predictor variable                   | Model 1                 | Model 2             | Model 3             | Model 4             | Model 5             | Model 6             | Model 7             | Model 8             |
|--------------------------------------|-------------------------|---------------------|---------------------|---------------------|---------------------|---------------------|---------------------|---------------------|
| Sex (male)                           | 0.98 (0.77,1.23)        | 0.99 (0.77,1.25)    | 0.98 (0.77,1.24)    | 0.98 (0.77,1.23)    | 0.98 (0.77,1.23)    | 0.98 (0.77,1.24)    | 0.99 (0.77,1.25)    | 1.00 (0.78,1.27)**  |
| Age                                  | 1.24 (0.76,2.06)        | 1.00 (0.57,1.54)    | 1.22 (0.76,1.92)    | 1.24 (0.78,1.90)    | 1.29 (0.79,1.93)    | 1.25 (0.87,1.75)    | 1.18 (0.79,1.58)    | 1.16 (0.81,1.53)    |
| Family Structure (Ref: both parents) |                         |                     |                     |                     |                     |                     |                     |                     |
| single parent                        | 1.50 (1.08,2.05)*       | 1.42 (1.01,1.94)*   | 1.36 (1.06,1.86)    | 1.36 (0.97,1.86)    | 1.37 (0.97,1.89)    | 1.38 (0.98,1.89)    | 1.36 (0.96,1.87)    | 1.35 (1.03,1.87)    |
| step family/other                    | 2.17 (1.46,3.13)<br>*** | 2.07 (1.38,2.99)*** | 2.02 (1.35,2.93)**  | 2.01 (1.35,2.92)**  | 2.03 (1.36,2.94)**  | 2.04 (1.36,2.97)**  | 2.02 (1.36,2.97)**  | 2.09 (1.38, 3.08)*  |
| Family Affluence (Ref: low)          |                         |                     |                     |                     |                     |                     |                     |                     |
| medium                               | 0.87 (0.63,1.16)        | 0.86 (0.63,1.16)    | 0.91 (0.66,1.22)    | 0.91 (0.66,1.23)    | 0.93 (0.67,1.26)    | 0.93 (0.67,1.26)    | 0.94 (0.68,1.26)    | 0.92 (0.66,1.26)    |
| high                                 | 1.10 (0.81,1.46)        | 1.16 (0.85,1.54)    | 1.24 (0.91,1.66)    | 1.26 (0.92,1.68)    | 1.27 (0.93,1.71)    | 1.28 (0.93,1.72)    | 1.28 (0.93,1.71)    | 1.27 (0.92,1.72)    |
| Ethnicity (white)                    | 0.72 (0.25, 1.61)       | 0.63 (0.23, 1.33)   | 0.60 (0.22,1.30)    | 0.64 (0.24,1.33)    | 0.65 (0.23,1.40)    | 0.68 (0.26, 1.47)   | 0.66 (0.25, 1.41)   | 0.63 (0.23, 1.35)   |
| On trade licence density             |                         | 1.03 (0.99,1.08)    | 1.04 (0.99,1.08)    | 1.03 (0.99,1.08)    | 1.03 (0.99,1.07)    | 1.03 (0.99,1.08)    | 1.03 (0.99,1.08)    | 1.03 (0.99,1.08)    |
| Off trade license density            |                         | 1.04 (0.94,1.15)    | 0.99 (0.90,1.11)    | 0.99 (0.89,1.10)    | 1.00 (0.90,1.11)    | 1.00 (0.90,1.11)    | 0.99 (0.89,1.10)    | 0.99 (0.89,1.11)    |
| Urban/rurality (Ref: Large cities)   |                         |                     |                     |                     |                     |                     |                     |                     |
| other urban                          |                         | 1.07 (0.68,1.60)    | 1.05 (0.66,1.58)    | 1.08 (0.68,1.63)    | 1.07 (0.68,1.62)    | 1.09 (0.69,1.66)    | 1.09 (0.69,1.66)    | 1.09 (0.69,1.65)    |
| accessible small towns               |                         | 2.41 (1.44,3.81) ** | 2.35 (1.40,3.71) ** | 2.44 (1.46,3.86) ** | 2.16 (1.28,3.43) ** | 2.24 (1.31,3.61) ** | 2.24 (1.31,3.58) ** | 2.23 (1.24,3.72) ** |
| accessible rural                     |                         | 1.19 (0.73,1.83)    | 1.25 (0.77,1.92)    | 1.33 (0.81,2.09)    | 1.28 (0.78,2.01)    | 1.34 (0.81,2.11)    | 1.35 (0.81,2.13)    | 1.39 (0.80,2.25)    |



Electronic supplementary material (ESM)

| Predictor variable                               | Model 1          | Model 2           | Model 3            | Model 4            | Model 5            | Model 6            | Model 7            | Model 8            |
|--------------------------------------------------|------------------|-------------------|--------------------|--------------------|--------------------|--------------------|--------------------|--------------------|
| remote small towns                               |                  | 1.39 (0.85,2.16)  | 1.31 (0.79,2.05)   | 1.40 (0.84,2.21)   | 1.35 (0.81,2.11)   | 1.41 (0.83,2.24)   | 1.42 (0.84,2.26)   | 1.46 (0.82,2.42)   |
| remote rural                                     |                  | 1.67 (1.07,2.49)* | 1.74 (1.10,2.62)*  | 1.99 (1.21,3.09)** | 1.91 (1.19,2.91)** | 2.04 (1.23,3.19)** | 2.01 (1.21,3.15)** | 2.10 (1.21,3.43)** |
| Neighbourhood deprivation (Ref: 1 most deprived) |                  |                   |                    |                    |                    |                    |                    |                    |
| 2                                                |                  |                   | 0.68 (0.45,0.97)*  | 0.72 (0.48,1.03)   | 0.72 (0.48,1.03)   | 0.73 (0.49,1.06)   | 0.75 (0.49,1.07)   | 0.74 (0.48,1.08)   |
| 3                                                |                  |                   | 0.64 (0.42,0.92) * | 0.68 (0.45,0.98) * | 0.71 (0.47,1.04)   | 0.73 (0.49,1.06)   | 0.74 (0.48,1.09)   | 0.73 (0.47,1.09)   |
| 4 least deprived                                 |                  |                   | 0.60 (0.39,0.87)** | 0.64 (0.42,0.94)*  | 0.68 (0.44,1.00)   | 0.70 (0.48,1.04)   | 0.70 (0.45,1.04)   | 0.69 (0.43,1.04)   |
| Neighbourhood social cohesion                    |                  |                   |                    | 0.67 (0.35,1.13)   |                    | 0.88 (0.42,1.62)   | 0.88 (0.39,1.69)   | 0.86 (0.37,1.72)   |
| Neighbourhood disorder                           |                  |                   |                    |                    | 3.78 (1.25,9.05)*  | 3.50 (1.00, 9.10)  | 2.36 (0.60, 6.54)  | 2.03 (0.46, 5.80)  |
| Perceived social cohesion                        |                  |                   |                    |                    |                    |                    | 1.00 (0.94,1.06)   | 1.00 (0.94,1.06)   |
| Perceived disorder                               |                  |                   |                    |                    |                    |                    | 1.09 (0.99,1.19)   | 1.09 (0.99,1.20)   |
| Neighbourhood variance                           | 0.09 (0.00,0.30) | 0.06 (0.00,0.23)  | 0.04 (0.00,0.19)   | 0.03 (0.00,0.13)   | 0.04 (0.00,0.18)   | 0.06 (0.00,0.22)   | 0.05 (0.00,0.22)   | 0.03 (0.00,0.17)   |
| School variance                                  |                  |                   |                    |                    |                    |                    |                    | 0.13 (0.00,0.37)   |
| DIC                                              | 1646.49          | 1638.34           | 1633.95            | 1633.01            | 1630.61            | 1631.51            | 1631.68            | 1627.20            |
| Residual Moran's I                               |                  |                   |                    |                    |                    |                    |                    | 0.008 (p=0.675)    |

Burn-in 5,000; chain 200,000; DIC=Deviance Information Criterion; Respondents missing on any predictor or outcome were not included in the models; \*=p<0.05, \*\*=p<0.01, \*\*\*p<0.001
